# Supplementary material for: Tusamitamab Ravtansine in Patients with Advanced Solid Tumors: Phase I Study of Safety, Pharmacokinetics, and Antitumor Activity Using Alternative Dosing Regimens
Source: PubMed Central journal article supplement (PMC10461573; doi:10.1158/2767-9764.crc-23-0284), 2023-08-28

**Supplementary Figure S1. Individual and mean ( $\pm$  standard deviation) tusamitamab ravtansine maximum plasma concentrations by dose level after first administration in Cohort Q2W-LD (A) and Cohort Q3W (B).**

$C_{max}$ , maximum plasma concentration; Q2W-LD, cohort receiving a loading dose at Day 1, Cycle 1, followed by a fixed dose every 2 weeks; Q3W, cohort receiving tusamitamab ravtansine every 3 weeks; SD, standard deviation.

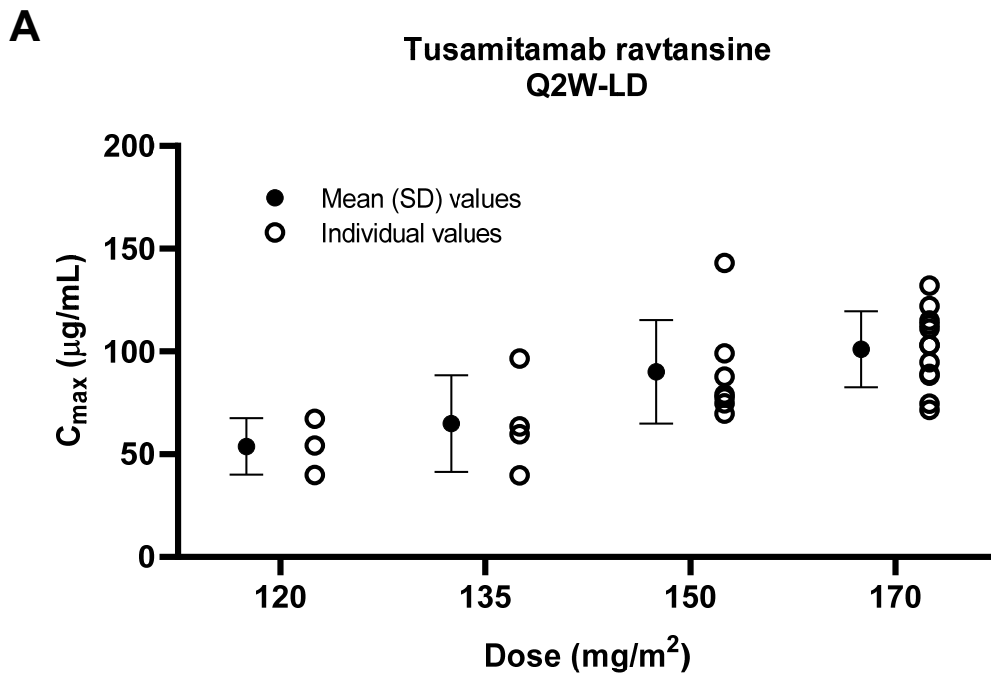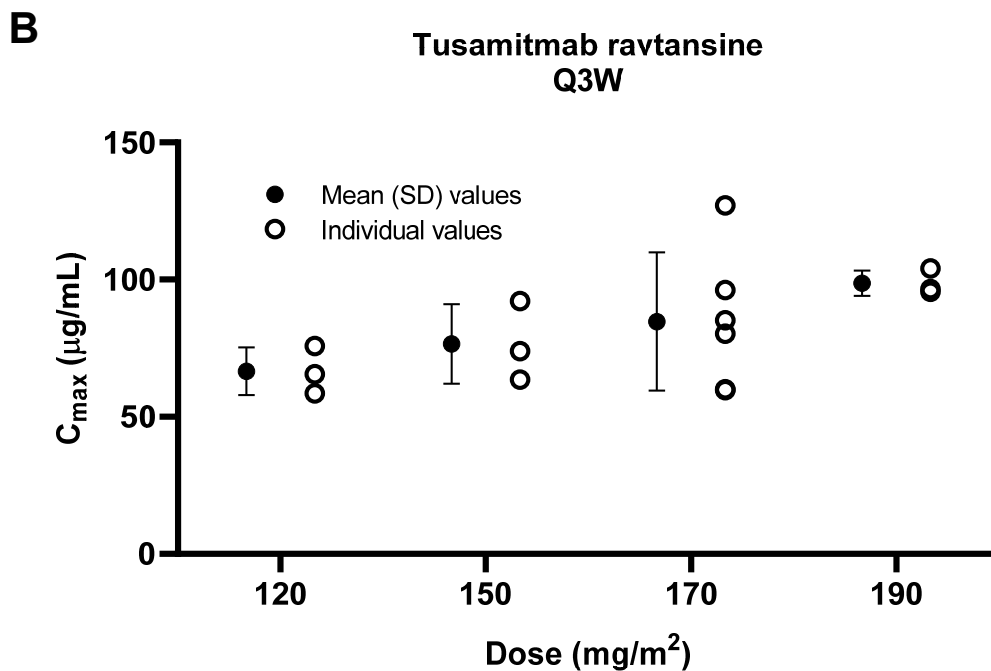

Supplement: crc-23-0284-s01.pdf [file crc-23-0284-s01.pdf]
