# Supplementary material for: Tusamitamab Ravtansine in Patients with Advanced Solid Tumors: Phase I Study of Safety, Pharmacokinetics, and Antitumor Activity Using Alternative Dosing Regimens
Source: PubMed Central journal article supplement (PMC10461573; doi:10.1158/2767-9764.crc-23-0284), 2023-08-28
Supplement: crc-23-0284-s03.pdf [file crc-23-0284-s03.pdf]

**Supplementary Table S1. Reasons for screen failure in cohorts Q2W-LD and Q3W**

|                                                                                                                                                                                                                     | Cohort Q2W-LD | Cohort Q3W |
|---------------------------------------------------------------------------------------------------------------------------------------------------------------------------------------------------------------------|---------------|------------|
| Patients screened, n                                                                                                                                                                                                | 38            | 21         |
| Screen failures, n                                                                                                                                                                                                  | 10            | 6          |
| Reasons for screen failure, n <sup>a</sup>                                                                                                                                                                          |               |            |
| No available FFPE archival tissue to evaluate CEACAM5 expression                                                                                                                                                    | 0             | 3          |
| ECOG PS > 1                                                                                                                                                                                                         | 1             | 0          |
| Unwillingness or inability to comply with study procedures                                                                                                                                                          | 1             | 0          |
| Significant concomitant illness                                                                                                                                                                                     | 3             | 2          |
| Significant laboratory abnormalities: SCr > 1.5× ULN or 1.0–1.5× ULN with CrCl < 60 mL/min; total bilirubin > 1.5× ULN; and/or AST or ALT > 2.5× ULN (without liver metastasis) or > 5× ULN (with liver metastasis) | 1             | 2          |
| Previous history of and/or unresolved corneal disorders or use of contact lenses                                                                                                                                    | 1             | 2          |
| Clinically significant cardiac conduction disturbances/arrhythmias                                                                                                                                                  | 1             | 0          |
| Contraindications to the use of topical ophthalmic vasoconstrictors and/or corticosteroids                                                                                                                          | 2             | 0          |

<sup>a</sup>More than one criterion could apply for an individual patient.

ALT, alanine aminotransferase; AST, aspartate aminotransferase; CEACAM5, carcinoembryonic antigen-related cell adhesion molecule 5; CrCl, creatinine clearance; ECOG PS, Eastern Cooperative Oncology Group performance status; FFPE, formalin-fixed paraffin-embedded; Q2W-LD, cohort receiving a loading dose at Day 1, Cycle 1, followed by a fixed dose every 2 weeks; Q3W, cohort receiving tusamitamab ravtansine every 3 weeks; SCr, serum creatinine; ULN, upper limit of normal.
