# Supplementary material for: Tusamitamab Ravtansine in Patients with Advanced Solid Tumors: Phase I Study of Safety, Pharmacokinetics, and Antitumor Activity Using Alternative Dosing Regimens
Source: PubMed Central journal article supplement (PMC10461573; doi:10.1158/2767-9764.crc-23-0284), 2023-08-28
Supplement: crc-23-0284-s04.pdf [file crc-23-0284-s04.pdf]

**Supplementary Table S2. Study population representativeness**

| <b>Characteristic</b> | <b>Comment</b>                                                                                                                                                                                                                                               |
|-----------------------|--------------------------------------------------------------------------------------------------------------------------------------------------------------------------------------------------------------------------------------------------------------|
| Sex                   | See Table 1. Although there were more men (67.9% of the total) than women in Cohort Q2W-LD, Cohort Q3W was roughly balanced between men (53.3%) and women.                                                                                                   |
| Age                   | See Table 1. Cohorts Q2W-LD and Q3W had patients with a median age of 59.5 and 59.0 years, respectively. The age range across the two cohorts was broad, from 34–73 years of age.                                                                            |
| Race/ethnicity        | Most (24 of 28) patients in Cohort Q2W-LD were White, and most ( $n = 21$ ) were non-Hispanic; 4 were Asian. All 15 patients in Cohort Q3W were White; a similar number of patients in Cohort Q3W were non-Hispanic ( $n = 8$ ) versus Hispanic ( $n = 7$ ). |
| Geography             | The study was conducted at sites in 4 countries total. Patients in Cohort Q2W-LD were enrolled at study sites in Canada, France, Republic of Korea, and Spain. Patients in Cohort Q3W were enrolled at study sites in Canada, France, and Spain.             |
| Other considerations  | The fact that this is a Phase 1 study conducted at a small number of sites in 4 countries inherently limits the population representativeness.                                                                                                               |

Q2W-LD, cohort receiving a loading dose of tusamitamab ravtansine at Day 1, Cycle 1, followed by a fixed dose every 2 weeks; Q3W, cohort receiving tusamitamab ravtansine every 3 weeks
