# Supplementary material for: Tusamitamab Ravtansine in Patients with Advanced Solid Tumors: Phase I Study of Safety, Pharmacokinetics, and Antitumor Activity Using Alternative Dosing Regimens
Source: PubMed Central journal article supplement (PMC10461573; doi:10.1158/2767-9764.crc-23-0284), 2023-08-28
Supplement: crc-23-0284-s05.pdf [file crc-23-0284-s05.pdf]

**Supplementary Table S3. Intensity of treatment in cohorts Q2W-LD and Q3W (all-treated/safety population)**

| Characteristic                                   | Cohort Q2W-LD, dose of tusamitamab ravtansine (mg/m <sup>2</sup> ) |                              |                              |                               |                 | Cohort Q3W, dose of tusamitamab ravtansine (mg/m <sup>2</sup> ) |                  |                  |                 |                 |
|--------------------------------------------------|--------------------------------------------------------------------|------------------------------|------------------------------|-------------------------------|-----------------|-----------------------------------------------------------------|------------------|------------------|-----------------|-----------------|
|                                                  | 120 C1, then 100 Q2W (n = 3)                                       | 135 C1, then 100 Q2W (n = 4) | 150 C1, then 100 Q2W (n = 8) | 170 C1, then 100 Q2W (n = 13) | All (N = 28)    | 120 Q3W (n = 3)                                                 | 150 Q3W (n = 3)  | 170 Q3W (n = 6)  | 190 Q3W (n = 3) | All (N = 15)    |
| Median duration of study treatment, weeks        | 12.0 (6.3, 14.0)                                                   | 6.1 (2.0, 27.1)              | 8.0 (4.0, 16.3)              | 8.0 (2.0, 32.1)               | 8.0 (2.0, 32.1) | 7.0 (6.0, 12.0)                                                 | 12.0 (6.0, 18.0) | 6.3 (3.0, 12.9)  | 6.0 (3.0, 8.3)  | 6.6 (3.0, 18.0) |
| Cycles administered to all patients, <i>n</i>    | 15                                                                 | 19                           | 31                           | 63                            | 128             | 8                                                               | 12               | 14               | 5               | 39              |
| Median cycles administered per patient, <i>n</i> | 6.0 (3.0, 6.0)                                                     | 3.0 (1.0, 12.0)              | 4.0 (2.0, 7.0)               | 4.0 (1.0, 12.0)               | 4.0 (1.0, 12.0) | 2.0 (2.0, 4.0)                                                  | 4.0 (2.0, 6.0)   | 2.0 (1.0, 4.0)   | 2.0 (1.0, 2.0)  | 2.0 (1.0, 6.0)  |
| Median cumulative dose, mg/m <sup>2</sup>        | 613 (316, 622)                                                     | 323 (135, 1254)              | 448.5 (248, 742)             | 469 (172, 1190)               | —               | 241 (238, 482)                                                  | 564 (297, 742)   | 334.5 (178, 678) | 354 (188, 382)  | —               |

Values are median (minimum, maximum) unless otherwise indicated.

C1, cycle 1; Q2W, every 2 weeks; Q2W-LD, cohort receiving a loading dose at Day 1, Cycle 1, followed by a fixed dose every 2 weeks; Q3W, cohort receiving tusamitamab ravtansine every 3 weeks; Q3W, every 3 weeks.
