# Supplementary material for: Tusamitamab Ravtansine in Patients with Advanced Solid Tumors: Phase I Study of Safety, Pharmacokinetics, and Antitumor Activity Using Alternative Dosing Regimens
Source: PubMed Central journal article supplement (PMC10461573; doi:10.1158/2767-9764.crc-23-0284), 2023-08-28
Supplement: crc-23-0284-s06.pdf [file crc-23-0284-s06.pdf]

**Supplementary Table S4. Plasma pharmacokinetics of tusamitamab ravtansine on Cycle 1 (cohort Q2W-LD)**

| <b>Tusamitamab ravtansine dose (mg/m<sup>2</sup>)</b> | <b>N</b> | <b>C<sub>max</sub> (µg/mL)</b> | <b>t<sub>max</sub><sup>a</sup> (day)</b> | <b>AUC<sub>0-14d</sub> (µg•day/mL)</b> | <b>AUC (µg•day/mL)</b>                | <b>t<sub>1/2z</sub> (day)</b>           | <b>CL (L/day)</b>                          | <b>V<sub>ss</sub> (L)</b>                |
|-------------------------------------------------------|----------|--------------------------------|------------------------------------------|----------------------------------------|---------------------------------------|-----------------------------------------|--------------------------------------------|------------------------------------------|
| 120                                                   | 3        | 53.8 ± 13.7<br>(52.6) [25]     | 0.05<br>(0.04–0.13)                      | 316 ± 92.5<br>(307) [29]               | 423 ± 221<br>(393) [52] <sup>b</sup>  | 8.39 ± 2.61<br>(8.10) [31]              | 0.670 ± 0.370<br>(0.617) [55] <sup>b</sup> | 5.35 ± 0.985<br>(5.31) [18] <sup>b</sup> |
| 135                                                   | 4        | 64.9 ± 23.5<br>(61.8) [36]     | 0.20<br>(0.13–0.33)                      | 334 ± 45.0<br>(331) [13]               | 422 ± 60.9<br>(419) [14] <sup>c</sup> | 6.30 ± 2.50<br>(5.92) [40]              | 0.546 ± 0.118<br>(0.537) [22] <sup>c</sup> | 3.74 ± 0.626<br>(3.71) [17] <sup>c</sup> |
| 150                                                   | 7        | 90.1 ± 25.2<br>(87.6) [28]     | 0.06<br>(0.05–0.30)                      | 445 ± 40.2<br>(443) [9]                | 563 ± 68.2<br>(560) [12] <sup>d</sup> | 7.35 ± 1.53<br>(7.21) [21]              | 0.526 ± 0.0476<br>(0.524) [9] <sup>d</sup> | 4.57 ± 0.782<br>(4.51) [17] <sup>d</sup> |
| 170                                                   | 12       | 101 ± 18.5<br>(99.8) [18]      | 0.06<br>(0.05–0.22)                      | 576 ± 162<br>(555) [28]                | 773 ± 247<br>(734) [32] <sup>e</sup>  | 7.13 ± 1.01<br>(7.06) [14] <sup>f</sup> | 0.435 ± 0.166<br>(0.410) [38] <sup>e</sup> | 4.02 ± 0.951<br>(3.91) [24] <sup>e</sup> |

Values are mean ± SD (geometric mean) [CV%] unless otherwise indicated.

<sup>a</sup>Median (min–max); <sup>b</sup>n = 2; <sup>c</sup>n = 3; <sup>d</sup>n = 5; <sup>e</sup>n = 10; <sup>f</sup>n = 11

AUC, area under the plasma concentration versus time curve from time zero extrapolated to infinity; AUC<sub>0-14d</sub>, area under the plasma concentration versus time curve during the 14-day dosing cycle; CL, clearance; C<sub>max</sub>, maximum plasma concentration; CV, coefficient of variation; Q2W-LD, cohort receiving a loading dose at Day 1, Cycle 1, followed by a fixed dose every 2 weeks; SD, standard deviation; t<sub>1/2z</sub>, terminal elimination half-life; t<sub>max</sub>, time to C<sub>max</sub>; V<sub>ss</sub>, volume of distribution at steady state.
