# Supplementary material for: Tusamitamab Ravtansine in Patients with Advanced Solid Tumors: Phase I Study of Safety, Pharmacokinetics, and Antitumor Activity Using Alternative Dosing Regimens
Source: PubMed Central journal article supplement (PMC10461573; doi:10.1158/2767-9764.crc-23-0284), 2023-08-28
Supplement: crc-23-0284-s07.pdf [file crc-23-0284-s07.pdf]

**Supplementary Table S5. Plasma pharmacokinetics of tusamitamab ravtansine on Cycle 1 (cohort Q3W)**

| <b>Tusamitamab ravtansine dose (mg/m<sup>2</sup>)</b> | <b>N</b> | <b>C<sub>max</sub> (µg/mL)</b> | <b>t<sub>max</sub><sup>a</sup> (day)</b> | <b>AUC<sub>0-21d</sub> (µg·day/mL)</b> | <b>AUC (µg·day/mL)</b>               | <b>t<sub>1/2z</sub> (day)</b>           | <b>CL (L/day)</b>                          | <b>V<sub>ss</sub> (L)</b>                |
|-------------------------------------------------------|----------|--------------------------------|------------------------------------------|----------------------------------------|--------------------------------------|-----------------------------------------|--------------------------------------------|------------------------------------------|
| 120                                                   | 3        | 66.6 ± 8.7<br>(66.3) [13]      | 0.05<br>(0.04–0.20)                      | 394 ± 55.1<br>(392) [14]               | 452 ± 90.9<br>(445) [20]             | 6.88 ± 1.94<br>(6.67) [28]              | 0.489 ± 0.143<br>(0.475) [29]              | 4.02 ± 0.908<br>(3.96) [23]              |
| 150                                                   | 2        | 76.6 ± 14.5<br>(75.7) [19]     | 0.22<br>(0.06–0.30)                      | 441 ± 167<br>(419) [38]                | 606 ± 200<br>(589) [33] <sup>b</sup> | 7.70 ± 1.40<br>(7.63) [18] <sup>b</sup> | 0.502 ± 0.181<br>(0.485) [36] <sup>b</sup> | 4.81 ± 0.736<br>(4.79) [15] <sup>b</sup> |
| 170                                                   | 6        | 84.7 ± 25.2<br>(81.8) [30]     | 0.07<br>(0.05–2.03)                      | 526 ± 139<br>(510) [26]                | 590 ± 164<br>(570) [28]              | 6.72 ± 0.922<br>(6.67) [14]             | 0.532 ± 0.183<br>(0.506) [34]              | 4.54 ± 1.67<br>(4.28) [37]               |
| 190                                                   | 3        | 98.7 ± 4.59<br>(98.7) [5]      | 0.07<br>(0.06–0.30)                      | 669 ± 126<br>(661) [19]                | 775 ± 207<br>(758) [27]              | 6.60 ± 0.872<br>(6.56) [13]             | 0.431 ± 0.0952<br>(0.424) [22]             | 3.68 ± 0.989<br>(3.60) [27]              |

Values are mean ± SD (geometric mean) [CV%].

<sup>a</sup>Median (min–max); <sup>b</sup>n = 2

AUC, area under the plasma concentration versus time curve from time zero extrapolated to infinity; AUC<sub>0-21d</sub>, area under the plasma concentration versus time curve during the 21-day dosing cycle; CL, clearance; C<sub>max</sub>, maximum plasma concentration; CV, coefficient of variation; Q3W, cohort receiving tusamitamab ravtansine every 3 weeks; SD, standard deviation; t<sub>1/2z</sub>, terminal elimination half-life; t<sub>max</sub>, time to C<sub>max</sub>; V<sub>ss</sub>, volume of distribution at steady state.
